# Supplementary material for: Troponin-I is present as an essential component of muscles in echinoderm larvae
Source: PubMed Central journal article supplement (PMC5341096; doi:10.1038/srep43563), 2017-03-08
Supplement: srep43563-s1.pdf [file srep43563-s1.pdf]

**Troponin-I is present as an essential component of muscles  
in echinoderm larvae**

Shunsuke Yaguchi<sup>1,†,\*</sup>, Junko Yaguchi<sup>1,†</sup>, Hiroyuki Tanaka<sup>2</sup>

<sup>1</sup>Shimoda Marine Research Center, University of Tsukuba, 5-10-1 Shimoda, Shizuoka 415-0025,  
Japan

<sup>2</sup>Faculty of Fisheries Sciences, Hokkaido University, 3-1-1 Minato-cho, Hakodate, Hokkaido  
041-8611, Japan

<sup>†</sup>The first two authors contributed equally.

Short title: Troponin-I in echinoderm.

\*Corresponding Author: Shunsuke Yaguchi, Shimoda Marine Research Center, University of  
Tsukuba, 5-10-1, Shimoda, Shizuoka, Japan 415-0025

Phone: +81-558-22-6716

Fax: +81-558-22-0346

E-mail: yag@shimoda.tsukuba.ac.jp

Supplementary Figure S1.

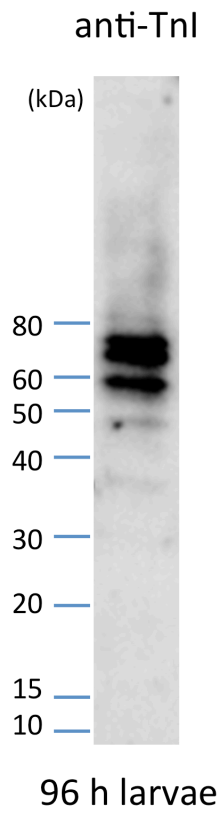

Western blot showing the molecular mass of HpTroponin-I. Three strong bands were detected between 55-75kDa.
